# Supplementary material for: An integratible acoustic micropump based on the resonance of on-substrate sharp-edge micropillar arrays
Source: Royal Society of Chemistry journal article supplement (doi:10.1039/d4lc00997e), 2025-01-01
Supplement: d4lc00997e1.pdf [file d4lc00997e1.pdf]

# Supplementary material for "An Integratable Acoustic Micropump Based on the Resonance of On-Substrate Sharp-Edge Micropillar Arrays"

Yu Zhang,<sup>a</sup> Zeyi Wang,<sup>a</sup> Yang Zhao<sup>a</sup>, Qinran Wei<sup>a</sup>, Haixiang Zheng<sup>a</sup>, Dong Zhang<sup>\*ab</sup>, and Xiasheng Guo<sup>\*ab</sup>

## S1. The governing equations for three-dimensional simulations

The models adopted in this study involve the SU-8 micropillar domain (described with the “solid mechanics” interface in COMSOL Multiphysics) and the water domain (the “thermoviscous acoustics” and “laminar flow” interfaces).

In the “solid mechanics” interface, SU-8 is treated as an isotropic elastic material. The mechanical stress tensor  $\sigma_1$  and the elastic displacement field  $u_1$  in the pillar are coupled with Hooke’s Law, which is given by

$$\begin{pmatrix} \sigma_x \\ \sigma_y \\ \sigma_z \\ \sigma_{yz} \\ \sigma_{xz} \\ \sigma_{xy} \end{pmatrix} = \begin{pmatrix} C_{11} & C_{12} & C_{12} & 0 & 0 & 0 \\ C_{12} & C_{11} & C_{12} & 0 & 0 & 0 \\ C_{12} & C_{12} & C_{11} & 0 & 0 & 0 \\ 0 & 0 & 0 & C_{44} & 0 & 0 \\ 0 & 0 & 0 & 0 & C_{44} & 0 \\ 0 & 0 & 0 & 0 & 0 & C_{44} \end{pmatrix} \begin{pmatrix} \partial_x u_x \\ \partial_y u_y \\ \partial_z u_z \\ \partial_z u_y + \partial_y u_z \\ \partial_z u_x + \partial_x u_z \\ \partial_y u_x + \partial_x u_y \end{pmatrix}, \quad (\text{S1})$$

where  $C_{ij}$  are the elastic constants. The damping effect in each pillar is introduced through complex-valued elastic coefficients

$$C_{ij} = C'_{ij} + iC''_{ij} = C'_{ij}(1 + i\eta_s), \quad (\text{S2})$$

where  $i = \sqrt{-1}$ ,  $\eta_s$  is an isotropic loss factor.  $C'_{ij}$  is determined by Young’s modulus  $E$  and the Poisson’s ratio  $\nu$

$$\begin{aligned} C'_{11} &= \frac{E(1-\nu)}{(1+\nu)(1-2\nu)}, \\ C'_{44} &= \frac{E}{(1+\nu)}, \\ C'_{12} &= C'_{11} - 2C'_{44}. \end{aligned} \quad (\text{S3})$$

The Cauchy equation takes the form

$$\nabla \cdot \sigma_1 = -\rho \omega^2 \mathbf{u}_1, \quad (\text{S4})$$

where  $\rho$  is the material’s mass density,  $\omega = 2\pi f$  is the angular frequency, and  $f$  is the driving frequency. At the bottom of each micropillar, a velocity boundary ( $\mathbf{v}_x$ ) in the  $x$ -direction (the side-to-side direction) with a magnitude of  $1 \times 10^{-3}$  m/s is applied by

$$i\omega \mathbf{u}_1 = \mathbf{v}_x. \quad (\text{S5})$$

In the “thermoviscous acoustics” interface, a perturbation theory is applied to model the system behaviour under harmonic actuation; such a protocol has been previously validated for studying the vibration of sharp edges<sup>1-5</sup>. At this point, the pressure field  $p$  and velocity field  $\mathbf{v}$  can be decomposed into two parts: the 1st-order fields  $p_1$  and  $\mathbf{v}_1$  that

<sup>a</sup> Key Laboratory of Modern Acoustics (MOE), School of Physics, Collaborative Innovation Centre of Advanced Microstructures, Nanjing University, Nanjing 210093, China.  
E-mail: guoxs@nju.edu.cn, dzhang@nju.edu.cn

<sup>b</sup> The Collaborative Innovation Center for Cardiovascular Disease Translational Medicine, Nanjing Medical University, Nanjing 211166, China.

21 oscillates at the angular frequency  $\omega$ , and the higher-order parts

$$\begin{aligned} p &= p_1 + o(p_1), \\ \mathbf{v} &= \mathbf{v}_1 + o(\mathbf{v}_1). \end{aligned} \quad (\text{S6})$$

22 For the 1st-order acoustic field, the behaviour of the fluid is described by the Navier-Stokes (NS) equation, the  
23 continuity equation and the energy conservation equation, i.e.,

$$\rho_0 \frac{\partial \mathbf{v}_1}{\partial t} = -\nabla p_1 + \mu \nabla^2 \mathbf{v}_1 + \left( \eta + \frac{1}{3} \mu \right) \nabla (\nabla \cdot \mathbf{v}_1), \quad (\text{S7})$$

$$\frac{\partial \rho_1}{\partial t} = -\rho_0 \nabla \cdot \mathbf{v}_1, \quad (\text{S8})$$

$$\frac{\partial T_1}{\partial t} = \nabla (D_T \nabla T_1) + \frac{\alpha T_0 \partial \rho_1}{\rho_0 C_p \partial t}. \quad (\text{S9})$$

26 Here,  $\rho_0$  is the fluid (water) density,  $\eta$  is the bulk viscosity,  $\mu$  is the dynamic viscosity,  $\rho_1$  is the 1st-order harmonic  
27 perturbation of the density,  $T_1$  is the 1st-order harmonic perturbation of the temperature,  $D_T$  is the thermal diffusivity,  $\alpha$   
28 is the isobaric thermal expansion coefficient,  $T_0 = 293.15\text{K}$  is the ambient temperature,  $C_p$  is the specific heat capacity at  
29 constant pressure. The equation of state is

$$\rho_1 = \frac{p_1}{c_0^2} - \rho_0 \alpha T_1, \quad (\text{S10})$$

30 where  $c_0$  is the speed of sound.

31 In the ‘‘thermoviscous acoustic-structure boundary’’ interface, the above two interfaces are coupled with the velocity  
32 continuity condition,

$$\mathbf{v}_1 = -i\omega \mathbf{u}_1. \quad (\text{S11})$$

33 The ‘‘impedance’’ boundaries are considered as

$$\mathbf{n} \cdot \nabla p_1 = -i \frac{\omega \rho_0}{z_i} p_1, \quad (\text{S12})$$

34 where  $z_i$  is the impedance of the corresponding material mimicked at the corresponding boundary.

35 In the ‘‘laminar flow’’ interface, the wavelength in the fluid (at the centimeter scale) significantly exceeds the di-  
36 mensions of the sharp edges (at the micrometer scale). Hence, it is appropriate to treat the fluid as incompressible<sup>3</sup>,  
37 i.e.,

$$\nabla \cdot \mathbf{v}_2 = 0, \quad (\text{S13})$$

38 where  $\mathbf{v}_2$  is the time-averaged flow velocity. The fluid can be described by the standard NS equation with an additional  
39 volume force  $\mathbf{F}_M$  arising from the time-averaged acoustic field<sup>2,3</sup>,

$$((\mathbf{v}_2 \cdot \nabla) \mathbf{v}_2) = \frac{1}{\rho_0} (\mathbf{F}_M - \nabla p_2) + \frac{\mu}{\rho_0} \nabla^2 \mathbf{v}_2, \quad (\text{S14})$$

40 where  $p_2$  is the time-averaged pressure. The volume force is defined as

$$\mathbf{F}_M = -\frac{\rho_0}{2} \text{Re} [(\mathbf{v}_1 \cdot \nabla) \mathbf{v}_1^*], \quad (\text{S15})$$

41 where  $\mathbf{v}_1^*$  is the complex conjugate of the complex-valued velocity  $\mathbf{v}_1$ .

42 The channel walls are treated as no-slip boundaries where  $\mathbf{v}_2 = 0$ . The inlet and outlet are set as open boundaries,  
43 characterised by a normal stress

$$\mu \nabla \mathbf{v}_2 \mathbf{n} - p_2 \mathbf{n} = -f_0 \mathbf{n}, \quad (\text{S16})$$

44 where  $f_0$  is the normal stress,  $\mathbf{n}$  is the unit normal vector of the boundary.

## 45 **S2. The internal flow resistance of the micropump-observation chip system**

46 The pumping pressure is calibrated by measuring the internal flow resistance of the micropump-observation chip  
47 system. The flow rate generated by the pressure difference between the inlet and outlet is measured when they are

48 immersed in two reservoirs positioned at different heights. This measurement is repeated three times for each of the five  
 49 height differences. The corresponding results are shown in Table S1.

**Table S1** Measurement results

| Pressure difference (Pa) | Flow rate (nL/s) | Flow resistance (Pa · s/mm <sup>3</sup> ) |
|--------------------------|------------------|-------------------------------------------|
| 200                      | 42.4             | 4717.0                                    |
|                          | 43.1             | 4640.4                                    |
|                          | 41.1             | 4866.2                                    |
| 400                      | 80.7             | 4956.6                                    |
|                          | 83.4             | 4796.2                                    |
|                          | 81.2             | 4926.1                                    |
| 600                      | 126.8            | 4731.9                                    |
|                          | 127.4            | 4709.6                                    |
|                          | 126.1            | 4758.1                                    |
| 800                      | 169.2            | 4728.1                                    |
|                          | 167.1            | 4787.6                                    |
|                          | 164.3            | 4869.1                                    |
| 1000                     | 197.2            | 5071.0                                    |
|                          | 208.8            | 4789.2                                    |
|                          | 203.2            | 4921.3                                    |

### 50 S3. The resonance frequency of an individual micropillar

51 When the dimensions of the micropillars are overwhelmed by the working wavelength, the vibration behaviour of a  
 52 micropillar resembles a small rod fixed at one end. The  $n$ -th resonance frequency in vacuum,  $f_{\text{vac},n}$ , is determined as<sup>6</sup>,

$$f_{\text{vac},n} = \frac{cK}{2\pi H^2} \kappa_n^2, \quad (\text{S17})$$

53 where  $c = \sqrt{E/\rho}$  is the longitudinal wave speed, with  $E$  and  $\rho$  being the Young's modulus and the density, respectively.  
 54  $\kappa_n$  is an eigenvalue corresponding to the  $n$ -th order resonance, which is a constant found elsewhere<sup>6</sup>. For the first-order  
 55 resonance mode, one has  $\kappa_1 = 1.875$ . The cross-sectional radius of gyration,  $K$ , quantifies the distribution of the cross-  
 56 sectional area relative to the axis of vibration, it is defined as

$$K^2 = \frac{1}{S} \int r^2 dS, \quad (\text{S18})$$

57 where  $r$  is the distance from a spatial point within the cross-sectional area to the axis;  $S = R^2(\pi/2 + \frac{\theta}{2} + 1/\tan \frac{\theta}{2})$  is the  
 58 surface area of the cross-section. By substituting the geometric parameters of the designed micropillar into Eq. (2),  $K$  is  
 59 obtained as

$$K = 2R \sqrt{\frac{\frac{1}{16}\pi + \frac{1}{16}\theta - \frac{1}{32}\sin(2\theta) + \frac{(\cos \frac{\theta}{2})^2}{3\tan \frac{\theta}{2}} - \frac{(\cos \frac{\theta}{2})^4}{4\tan \frac{\theta}{2}}}{\pi + \theta + \frac{2}{\tan \frac{\theta}{2}}}} = 2R\Theta(\theta). \quad (\text{S19})$$

60 The first-order resonance frequency in vacuum  $f_{\text{vac},1}$  is then

$$f_{\text{vac},1} = 3.5156 \frac{cR}{\pi H^2} \Theta(\theta). \quad (\text{S20})$$

61 As the micropillar is immersed in water, the impact of the surrounding liquid can be described as a correction coeffi-  
 62 cient<sup>7,8</sup>

$$\frac{f_n}{f_{\text{vac},n}} = \sqrt{\frac{m_s}{m_s + m_f}}, \quad (\text{S21})$$

63 where  $f_n$  is the  $n$ th resonance frequency in liquid,  $m_s = \rho S$  is the micropillar's mass per unit height,  $m_f = \rho_0 \pi (L \cos \frac{\theta}{2})^2 / 4$   
 64 is the added mass term. Here,  $\rho_0$  is the density of the liquid, and  $L = R(1 + 1/\sin \frac{\theta}{2}) + R_0(1 - 1/\sin \frac{\theta}{2})$  is the length of the  
 65 teardrop cross-section, where  $R_0$  is the round corner's radius at the tip due to actual fabrication.

66 Finally, the first-order resonance frequency of a micropillar in fluids is determined as

$$f_1 = 3.5156 \frac{cR}{\pi H^2} \Theta(\theta) \left\{ 1 + \frac{\pi \rho_0 \left[ \left(1 + \frac{R_0}{R}\right) \cos \frac{\theta}{2} + \frac{1 - \frac{R_0}{R}}{\tan \frac{\theta}{2}} \right]^2}{4\rho \left( \frac{\pi}{2} + \frac{\theta}{2} + \frac{1}{\tan \frac{\theta}{2}} \right)^2} \right\}^{-0.5} \quad (S22)$$

#### 67 S4. Supplementary videos

68 Video S1: Particle motions recorded in a micropump employing a diamond array of micropillars.

69 Video S2: The pumping process in the observation chip when the PZT transducer is switched on and off at a frequency  
70 of 10 Hz and a duty cycle of 50%.

71 Video S3: The pumping process in the observation chip when the amplitude of the driving signal is modulated with a  
72 sawtooth profile at a modulation frequency of 1 Hz.

73 Video S4: The pumping process in the observation chip when the amplitude of the driving signal is modulated with a  
74 sinusoidal profile at a modulation frequency of 1 Hz.

75 Video S5: Separation of 10 and 5  $\mu\text{m}$  PS particles recorded in a bright field.

76 Video S6: Particle motions recorded in a micropump employing a square array of micropillars.

#### 77 Supplementary Figures

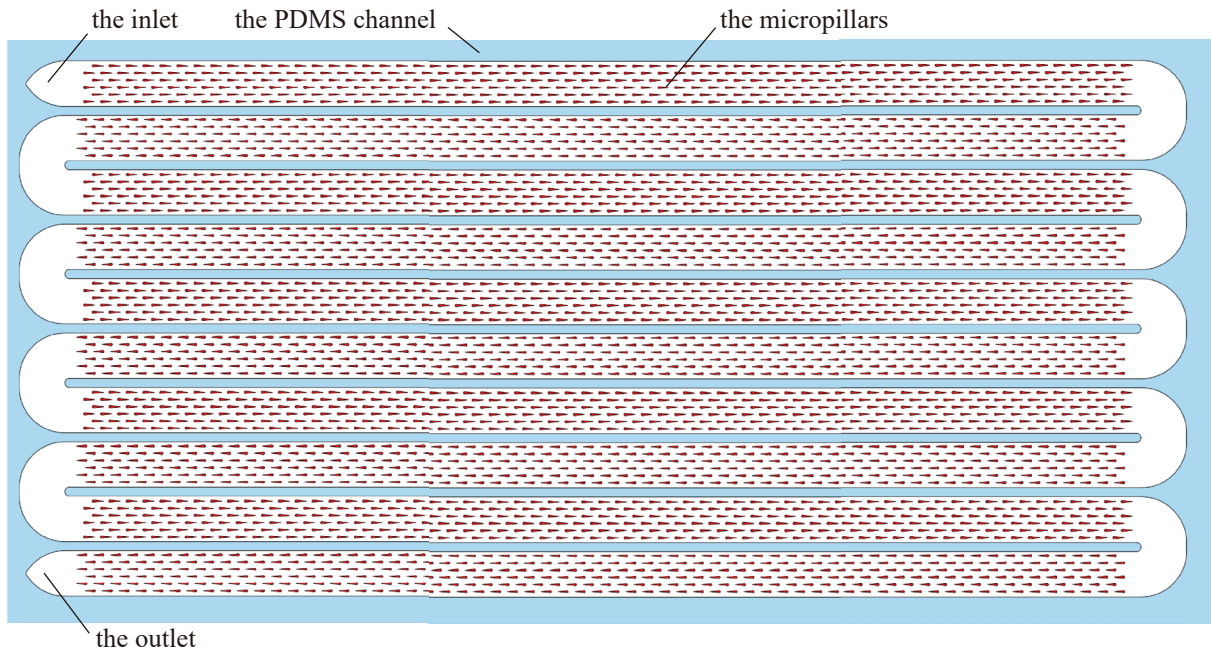

Fig. S1 The design of the micropump (top view).

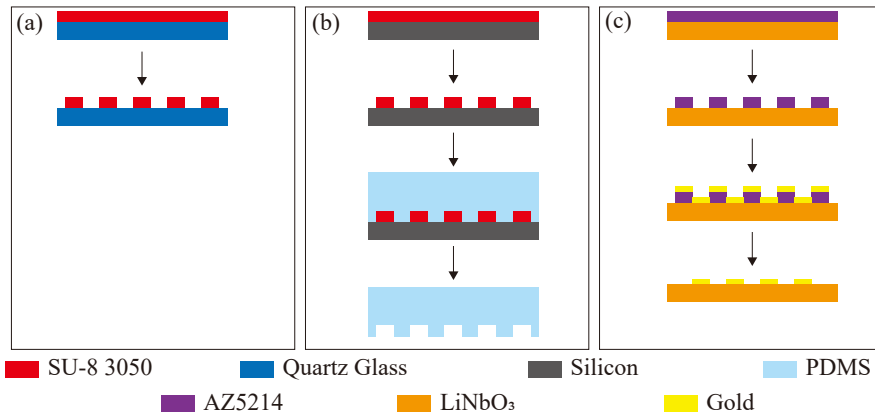

**Fig. S2** The fabrication process of the devices. (a) The fabrication of the micropillars includes steps of spin-coating (of SU-8 3050 photoresist) and UV lithography. (b) The fabrication of the microchannel includes steps of spin-coating (of SU-8 3050 photoresist), UV lithography, and PDMS molding. (c) The fabrication of the TaSSAWs device includes steps of spin-coating (of AZ5214 photoresist), UV lithography, magnetron sputtering, and lift-off.

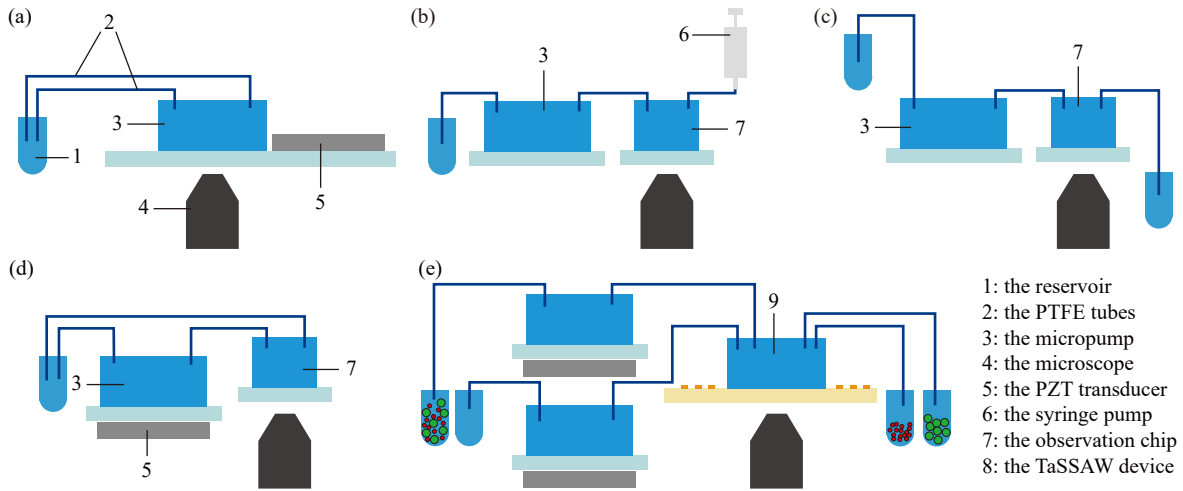

**Fig. S3** The experimental setup. (a) PIV measurements to characterise streaming patterns. (b) Calibration of the flow rate. (c) Calibration of the pumping pressure. (d) Characterisation of the micropump performance. (e) Two micropumps are used as feed units for a TaSSAW-based acoustofluidic chip for particle separation.

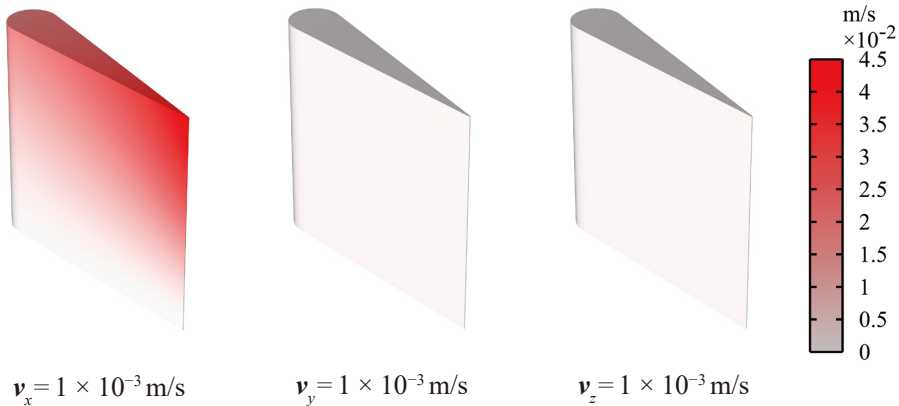

**Fig. S4** The velocity distribution of a micropillar actuated at the bottom in different directions. The results indicate that only the actuation in the  $x$  direction can effectively excite the first-order resonance mode.

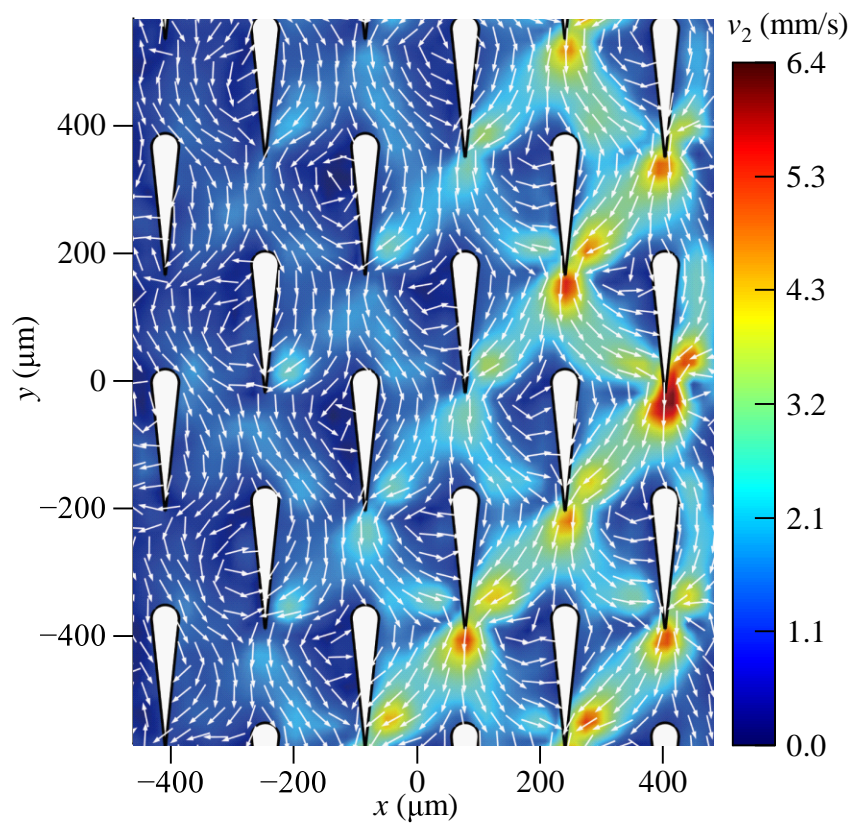

Fig. S5 The tracer velocity map obtained through PIV measurements, corresponding to the streamlines in Fig. 3.

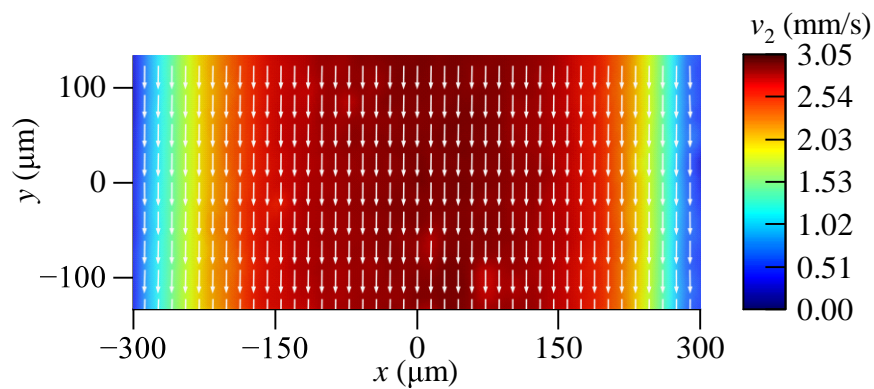

Fig. S6 The tracer velocity map in the observation chip, corresponding to the pumping process driven at a voltage of  $V_{p-p} = 54$  V.

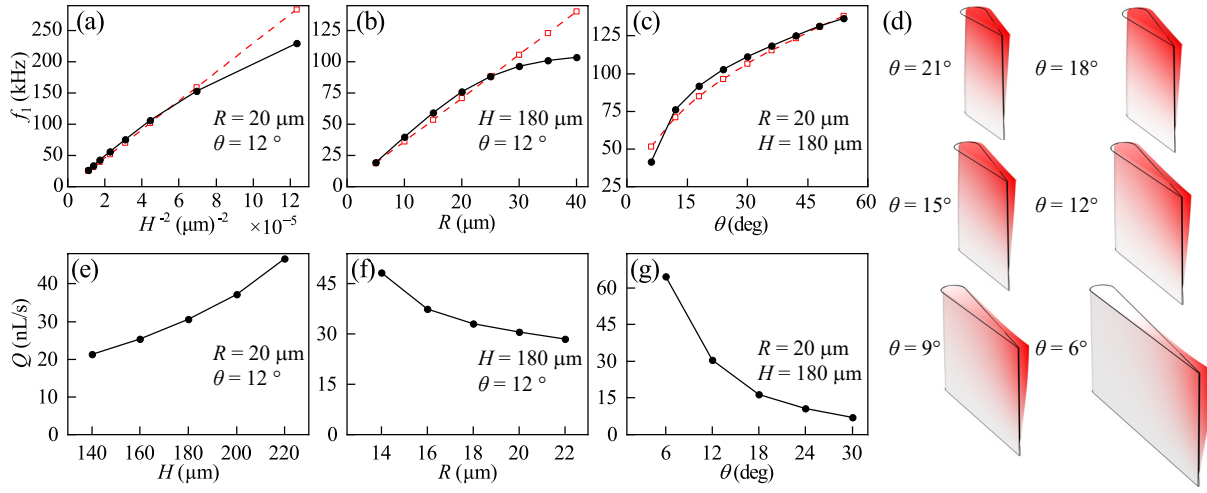

**Fig. S7** The performance of a single micropillar. (a)–(c) The dependence of the first-order resonance frequency on the three parameters  $H$ ,  $R$  and  $\theta$  (black solid lines: FE simulation results; red dashed lines: theoretical predictions). (d) Transition of the resonance mode. (e)–(g) The directional flow rate generated by a single micropillar as  $H$ ,  $R$  or  $\theta$  varies independently.

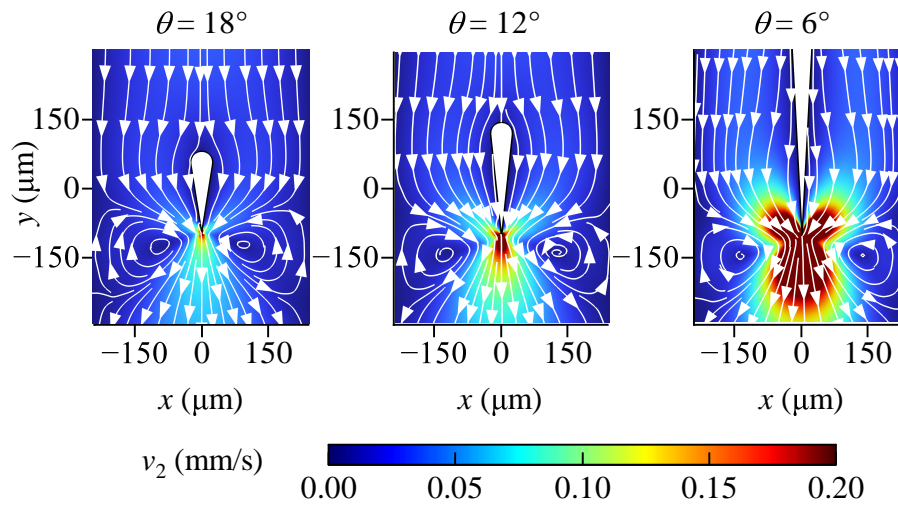

**Fig. S8** The streaming pattern generated by a micropillar with different  $\theta$ .

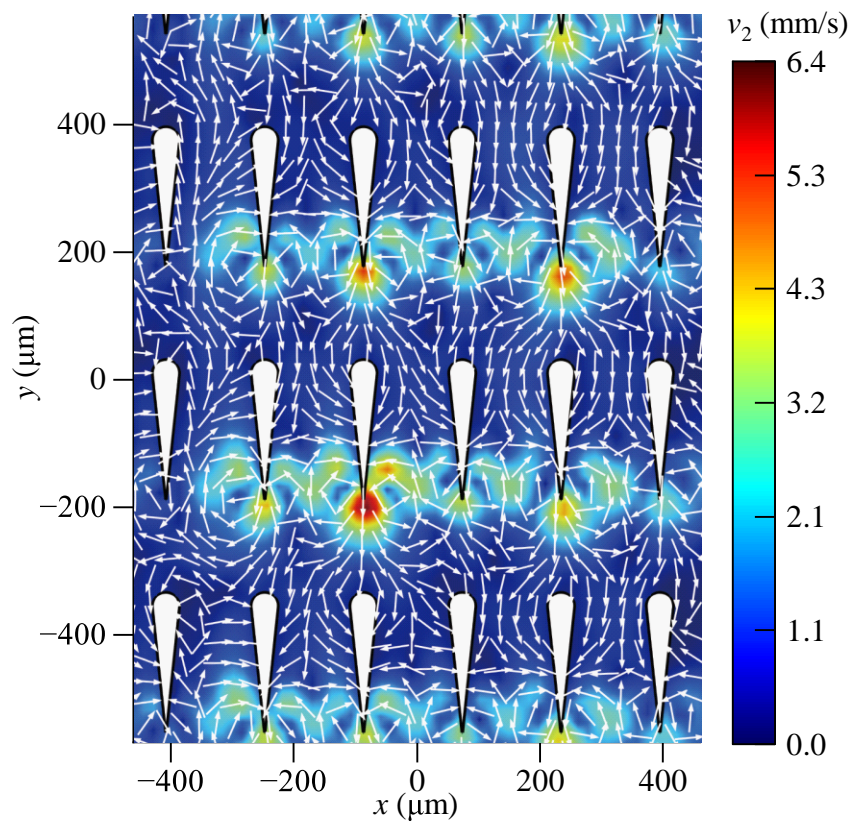

Fig. S9 The tracer velocity field obtained through PIV measurements, corresponding to the streamlines in Fig. 7.

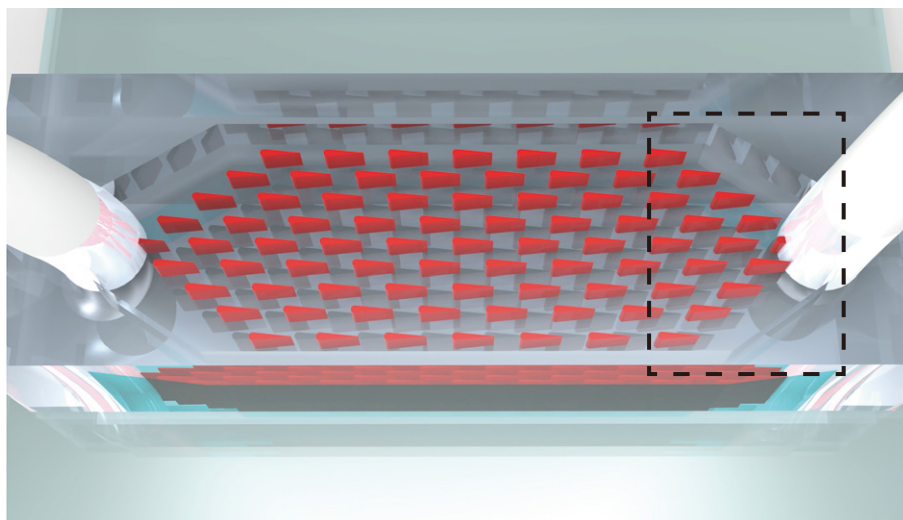

Fig. S10 The schematic diagram of a micropump with a wide channel design. The black square shows the observing region corresponding to Fig. 9.



## 78 References

- 79 1 A. A. Doinikov, M. S. Gerlt, A. Pavlic and J. Dual, *Microfluid. Nanofluid.*, 2020, **24**, 32.
- 80 2 C. Zhang, X. Guo, P. Brunet, M. Costalonga and L. Royon, *Microfluid. Nanofluid.*, 2019, **23**, 104.
- 81 3 M. Ovchinnikov, J. Zhou and S. Yalamanchili, *J. Acoust. Soc. Am.*, 2014, **136**, 22–29.
- 82 4 N. Nama, P.-H. Huang, T. J. Huang and F. Costanzo, *Lab Chip*, 2014, **14**, 2824–2836.
- 83 5 C. Zhang, X. Guo, L. Royon and P. Brunet, *Phys. Rev. E*, 2020, **102**, 043110.
- 84 6 P. M. Morse and K. U. Ingard, *Theoretical Acoustics*, Princeton University Press, Princeton, N.J, 1986.
- 85 7 M. R. Kramer, Z. Liu and Y. L. Young, *Compos. Struct.*, 2013, **95**, 254–263.
- 86 8 M. R. Motley, M. R. Kramer and Y. L. Young, *Compos. Struct.*, 2013, **96**, 365–375.
